1 **Title:** The host brain is permissive to colonization by *Toxoplasma gondii*

2

3 **Authors:** Wincott, CJ.<sup>1</sup>, Sritharan, G.<sup>1,2</sup>, Bunyan, M.<sup>3</sup>, Alves, E.<sup>1</sup>, Benns, HJ.<sup>1,4</sup>, Frickel, EM.<sup>3,5</sup>, Ewald, SE.<sup>6</sup>,  
4 Child, MA.<sup>1\*</sup>

5

6 \* indicates corresponding author

7

8 **Author affiliations:**

9 <sup>1</sup> Department of Life Sciences, Imperial College London, South Kensington Campus, London SW7 2AZ,  
10 UK

11 <sup>2</sup> Department of Biological Sciences, Birkbeck, University of London, Malet Street, Bloomsbury London  
12 WC1E 7HX, UK

13 <sup>3</sup> Host-Toxoplasma Interaction Laboratory, The Francis Crick Institute, 1 Midland Road, London NW1 1BF,  
14 UK

15 <sup>4</sup> Department of Chemistry, Imperial College London, White City Campus, London W12 0BZ, UK

16 <sup>5</sup> Institute of Microbiology and Infection, School of Biosciences, University of Birmingham, Edgbaston B15  
17 2TT, UK

18 <sup>6</sup> Department of Microbiology, Immunology and Cancer Biology at the Carter Immunology Center,  
19 University of Virginia School of Medicine, Charlottesville VA 228908 USA

20

21

22

23

24

25

26

27

28

29

30

31

32

### 33 **Summary**

34 Pathogenic infections and the diseases they cause are defined by invasion and colonization of distinct host  
35 cell types and tissue niches. In the case of viruses and bacteria, molecular and cellular barcoding has shaped  
36 our understanding of within-host pathogen population dynamics, and informed therapeutic intervention  
37 strategies. Host brain colonization is a clinically untreatable feature of persistent infection by the eukaryotic  
38 pathogen *Toxoplasma gondii*, and the process remains poorly understood. The host blood-brain barrier is  
39 expected to physically restrict parasite colonization of this tissue niche and force the infection through a  
40 selection bottleneck, however tools and technologies to test this hypothesis have not been available. Here,  
41 we have developed a simple CRISPR-based method to barcode *Toxoplasma* parasites, and then used  
42 complex libraries of barcoded parasites to define how the different phases of an infection shape the pathogen  
43 population structure. Unexpectedly, we have discovered that the murine host brain does not restrict parasite  
44 colonization, with the population structure predominantly shaped by a bottleneck experienced during the  
45 acute phase of infection. These data support an evolutionary strategy to maximize genetic diversity of  
46 parasite persister cells within the intermediate host brain for subsequent transmission into the definitive  
47 feline host.

48

### 49 **Main text**

50 Microbial colonization of tissues and organs within the host organism is a key feature of host-pathogen  
51 interactions, and often responsible for the pathology of the associated disease (Ribet and Cossart, 2015). For  
52 example, colonization of the brain by the eukaryotic protozoan parasite *Toxoplasma gondii* during the  
53 chronic phase of an infection can lead to toxoplasmic encephalitis in immunocompromised hosts (Luft et al.,  
54 1993). The spatial redistribution of a *T. gondii* infection as it transitions from the broadly distributed acute to  
55 the skeletal muscle and brain-associated chronic phase is accompanied by cellular differentiation; the  
56 parasite converts from the tachyzoite to the slower growing encysted bradyzoite (Wohlfert et al., 2017).  
57 Bradyzoite differentiation in niches like the brain is essential for transmission, and therefore competition  
58 prior to and during brain colonization is expected to have an impact on long-term success of a clone.  
59 Significant advances have been made in understanding how tachyzoites differentiate into persister-like  
60 bradyzoites (Barrett et al., 2019), with the transcription factor BFD1 recently shown to be a master  
61 developmental regulator (Waldman et al., 2020). In contrast, the effect of this developmental transition upon

62 the parasite's population structure during colonization of the immune-privileged brain niche remains an  
63 intangible mystery. One critical function of the blood-brain-barrier (BBB) is to physically restrict the access  
64 of pathogens such as *T. gondii* to the brain (Kim, 2008, Elsheikha and Khan, 2010). Therefore, it is  
65 anticipated that the BBB imposes a selection bottleneck upon the *T. gondii* population as the chronic  
66 infection is established, but we lack the tools to determine if this is true.

67 DNA-based molecular barcoding has been instrumental for understanding how the host and the  
68 infection process influences genetic complexity of pathogen populations, and colonization dynamics  
69 (Blundell and Levy, 2014, Keschull and Zador, 2018). Early studies using restriction site-tagged poliovirus  
70 identified a bottleneck limiting the genetic diversity of viral quasispecies transmitted to the murine brain  
71 (Pfeiffer and Kirkegaard, 2006). Furthermore, studies using Wild-type Isogenic Tagged Strains (WITS) of  
72 *Salmonella* have provided key insights into selection bottlenecks experienced during colonization of distinct  
73 tissues and organs across the different phases of the infection (Grant et al., 2008, Lim et al., 2014). The  
74 population structure of *Salmonella* infection was found to experience dramatic selective bottlenecks during  
75 the colonization of the gut niche, with predominant colonizing strain also the dominant strain transmitted by  
76 super shedders (Lam and Monack, 2014). The generation of WITS requires the insertion of molecular  
77 barcodes into the genome of the infectious agent (Grant et al., 2008). These cellular barcodes then function  
78 as neutral alleles, allowing the complexity of the population to be closely monitored and mapped over the  
79 course of an infection using quantitative next-generation sequencing (NGS) approaches. Molecular  
80 barcoding has provided unique insights into the population structures of both viral and prokaryotic infectious  
81 disease, but due to technical limitations has not been used to study the within-host population structure of  
82 eukaryotic pathogens.

83 Here, we define how the acute-to-chronic transition and brain colonization by *T. gondii* shapes the  
84 active infection population structure of this eukaryotic pathogen. We establish a simple, scalable CRISPR-  
85 based single-strand oligo recombineering strategy to efficiently generate libraries of molecularly barcoded *T.*  
86 *gondii* strains. In the absence of environmental pressures these barcode libraries are stable, enabling  
87 quantitative analysis of the effect of the intact host organism environment upon parasite population  
88 dynamics. We then use these libraries to investigate the influence of the host organism upon the infection  
89 population structure of *T. gondii*, revealing that the brain niche is unexpectedly permissive to colonization by  
90 this ubiquitous pathogen.

91

## 92 **Results**

### 93 ***Toxoplasma tachyzoites can be molecularly barcoded with a simple CRISPR-based strategy***

94 Inspired by WITS (Grant et al., 2008), we first sought to establish a system to molecularly barcode the  
95 eukaryotic pathogen, *T. gondii*. A CRISPR-Cas9 single-strand oligonucleotide recombineering strategy was  
96 designed for site-specific integration of molecular barcodes into the genome of *Toxoplasma* tachyzoites (**Fig.**  
97 **1a**). Parasites lacking the non-homologous end joining pathway (Huynh and Carruthers, 2009) (*RH $\Delta$ ku80*)  
98 were co-transfected with a single plasmid encoding both the Cas9 nuclease and guide RNA (gRNA) scaffold  
99 (Shen et al., 2014), and a unique single-stranded oligo donor template encoding the molecular barcode.  
100 Targeting of the Cas9 nuclease to the *UPRT* locus promoted efficient integration of a 60-nucleotide single-  
101 stranded donor template. Barcode integration disrupted the *UPRT* coding sequence, conferring resistance to  
102 the prodrug 5-fluorodeoxyuridine (FUDR) and enabling positive selection of successfully barcoded parasite  
103 strains (Donald and Roos, 1995). Our strategy also deleted both the protospacer DNA sequence recognized  
104 by the CRISPR gRNA and the protospacer adjacent motif (PAM), preventing further modification of the site  
105 following a single barcode integration event. Sanger sequencing of an amplicon derived from the *UPRT*  
106 locus in the drug-resistant parasite population confirmed the expected genomic rearrangement following  
107 barcode oligo integration (**Fig. 1b**). This demonstrated that individual parasites encode single barcodes  
108 within amplicons derived from the *UPRT* locus, and validated the use of short single-stranded donor  
109 templates for HDR in *Toxoplasma*. This strategy allows for unique single barcodes to be inserted at the same  
110 genomic position, enabling population genetic studies.

111

### 112 ***Barcode alleles can be identified and quantified in complex populations***

113 Following successful design and implementation of our molecular barcoding strategy, a multiplexed  
114 platform was established for 96-well plate-based transfections. This enabled parallel production of plate-  
115 mapped 96-member libraries of molecularly barcoded parasites. To quantify the relative representation of  
116 individual barcodes within a complex 96-member library pool we employed an NGS pipeline based on  
117 amplicon deep sequencing of the barcoded *UPRT* locus, combined with barcode counting (Smith et al.,  
118 2009) (**Fig. 1c**). A specific amplicon encompassing the molecular barcode was amplified from parasite  
119 genomic DNA (**Fig. S1**). The purified amplicon was indexed and sequenced on an Illumina platform (MiSeq

120 or NextSeq), and the data processed using Galaxy (Afgan et al., 2018). We first tested our ability to identify  
121 all 96 variants within a single population. Following multiplexed transfections, all 96 uniquely barcoded  
122 strains were combined to create a mixed library pool and then processed within our pipeline. We  
123 successfully identified all 96 uniquely barcoded strains (**Fig. 1d**). Biological replicates of our multiplexed  
124 transfections, and technical replicates with unique NGS libraries prepared from the same genomic material  
125 were compared (**Fig. S2a**). We observed the highest variation between independent biological experiments  
126 (**Fig. S2b**). Independently indexed libraries generated from single genomic samples were well correlated  
127 with the relative representation of individual barcodes within complex populations, indicating excellent  
128 technical reproducibility (**Fig. S2c and d**).

129 To determine the sensitivity of the NGS readout we defined the relationship between parasite  
130 number, barcode frequency within the complex population, and NGS reads. Using a plate-based two-fold  
131 dilution series of the barcoded strain library followed by NGS and barcode counting, we observed a positive  
132 correlation between parasite input and read output from 10,000 parasites/barcode down to a lower limit of  
133 ~39 parasites/barcode, with a Pearson correlation coefficient (PCC)  $r = 0.9954$  within this range (**Fig. 1e**).  
134 This confirmed that barcodes could be successfully identified and reliably quantified at relative frequencies  
135 as low as 0.0002 (0.02%). Combined these data demonstrated that our pipeline was able to identify  
136 individual barcodes within libraries of at least 96-member complexity with high sensitivity.

137

### 138 ***Barcoded parasite libraries are stably maintained in vitro and in vivo.***

139 To test whether the complexity of the barcode libraries was stably maintained *in vitro* in the absence of host-  
140 organism selective pressure, the pooled library of barcoded parasites was serially passaged through human  
141 foreskin fibroblasts (HFFs). Lysed-out parasite cultures were sampled every passage (~36 hours) for a period  
142 of six passages, equal to a minimum of six complete lytic growth cycles (invasion, replication, egress). The  
143 genetic complexity of the barcode population *in vitro* was remarkably stable, with the PCC testing the  
144 relationship between barcode abundance at the beginning and end of each 36-hour passage consistently  
145  $>0.96$  (**Fig. 2a, S3a-e**). This was emphasized by the comparison of the first and last passages (P1 vs. P6),  
146 which had a PCC of 0.95, demonstrating that the genetic complexity of the 96-member barcode library was  
147 stably maintained over multiple rounds of lytic growth (**Fig. S3f**).

148           Following confirmation of *in vitro* stability, we tested our ability to propagate and recover the  
149 barcode library *in vivo* within a murine host. For the purposes of this pilot experiment we focused on a 36-  
150 hour intra peritoneal infection, reasoning that host immune pressure would be low at this early infection  
151 timepoint. Thus the relative stability of the population *in vivo* would be minimally influenced by the host  
152 immune system that might complicate interpretation. Four separate inoculums of the complex barcode  
153 library pool ( $0.25 \times 10^6$ ,  $0.5 \times 10^6$ ,  $1 \times 10^6$  or  $2 \times 10^6$  parasites) were injected intraperitoneally into C57BL/6  
154 mice, and the infection allowed to proceed for 36 hours before retrieval of parasites from the peritoneal  
155 cavity. For this pilot experiment, the poor growth of a subset of transfected parasites limited the barcode  
156 library complexity within the inoculum to 63 strains. Comparison of the infection input with the retrieved  
157 output samples showed positive correlation for the highest inoculum, PCC = 0.98 (**Fig. 2b**). This  
158 demonstrated that for the highest inoculum and within a 36-hour *in vivo* infection window, the genetic  
159 complexity of the barcode library was stable and could be successfully retrieved from the murine host.  
160 Combined these data confirmed that, in the absence of significant selective pressures, barcode library  
161 complexity was stably maintained *in vitro* and *in vivo*. Reduced correlation observed for the lower dose  
162 infections may be attributed to an artificial bottleneck created by inoculum dilution and not to any host-  
163 derived process (**Fig. S4a-c**).

164           Following demonstration that barcoded libraries of parasites could be successfully generated by  
165 multiplexed transfection, we tested the limits of our method. We hypothesized that the CRISPR-Cas9  
166 strategy used to promote integration of barcode oligos by HDR could support simultaneous integration of  
167 multiple individual barcodes across an entire population, within a single transfection. This would simplify  
168 complex barcode library production into a single “one-pot” transfection using widely available cuvette-based  
169 transfection apparatus. To test this, a single transfection was performed on a single isolated population of  
170 parasites using the CRISPR-Cas9 approach described, but with all 96 HDR barcoding oligos combined into a  
171 single pool. This pooled transfection was performed in parallel in representative type I and type II parasite  
172 strains (RH $\Delta ku80$  and Pru $\Delta ku80$  respectively), using the same mixed pool of 96 barcode oligo repair  
173 templates. FUDR-resistant parasite populations were established, genomic DNA isolated, amplicons  
174 prepared, and NGS libraries sequenced. We identified all 96 barcodes within the sequence reads generated  
175 from the integration-specific amplicon (**Fig. S5a, b**). Variation between the relative frequencies of individual  
176 barcode alleles within the population was observed, indicating the possibility of an unanticipated barcode

177 effect upon parasite fitness. However, comparison of the two independently transfected parasite strains  
178 exhibited correlated frequency distributions for the different barcodes (**Fig. 2c, S5c**). We therefore concluded  
179 that differences were likely due to the high sensitivity of the readout identifying minor differences in the  
180 relative abundance of each barcode HDR template within the pool used for transfection. These data also  
181 indicated a higher level of biological reproducibility for one-pot pool transfected libraries than those  
182 generated using the original multiplexed transfection approach (**Fig. S2b**). One-pot pool-transfected  
183 barcoded populations were used for all subsequent experiments.

184

### 185 ***Cellular barcodes reveal the population structure of a eukaryotic pathogen infection***

186 The transition of the *T. gondii* infection *in vivo* from the acute to the chronic stage is typified by the spatial  
187 redistribution of the parasite into skeletal muscle and the central nervous system (Wohlfert et al., 2017).  
188 Colonization of these environments is accompanied by the differentiation of parasites from the tachyzoite  
189 lifecycle form into slower growing encysted bradyzoites, which is important for parasite transmission  
190 (Barrett et al., 2019). The restrictive nature of the BBB is well documented (Profaci et al., 2020) and we  
191 hypothesized that the spatial, temporal, and developmental transitions occurring during the acute-to-chronic  
192 infection *in vivo* would impose bottlenecks upon the parasite population represented in the brain. We sought  
193 to test this by quantifying changes in the relative frequency distribution of our 96 neutral barcode alleles. An  
194 infection study was conceived to assess population structure changes over the course of a full infection,  
195 focused on determining the width of the bottleneck experienced by the parasite population as it colonizes the  
196 brain of the CBA/J murine host (**Fig. 2d**). We compared changes in the frequency distribution of barcodes in  
197 the inoculum, at the acute phase of infection in the peritoneal cavity (at 48 hours) and once chronic infection  
198 was established in the brain at day 28. Comparison of independent replicate NGS runs for individual libraries  
199 indicated a very high degree of reproducibility (**Fig. S5d**), allowing us to confidently compare samples  
200 multiplexed across different NGS runs. Considering the 36-hour pilot infection data using lower inoculums  
201 (**Fig. S4**), we anticipated that the dilution of parasite cultures for the inoculum could affect relative  
202 frequencies of barcodes within the population and influence our interpretation of data outputs. To control for  
203 this, the initial transfected pool was compared to inoculum samples (37,000 tachyzoites) re-expanded *in vitro*  
204 (**Fig. 2d**). The artificial bottleneck imposed by dilution led to changes in the relative frequencies of  
205 individual barcode, observed through a loss of correlation between the samples (**Fig. S5e**). Although relative

206 frequencies changed, overall library coverage was retained with all 96 barcodes still represented within the  
207 population. Independently expanded populations of the same 37,000 parasite inoculum were highly  
208 correlated with one another (**Fig. S5f-h**), confirming that *in vitro* expansion of *in vivo* samples would  
209 minimally affect library composition. At 48 hours, shifts in the relative frequencies of barcodes within the  
210 peritoneal exudate populations were compared to the averaged barcode representation in the inoculum  
211 samples (**Fig. 2e, f**), and these changes were unique to each animal. This indicated that stochastic selective  
212 pressures likely drive initial selective sweeps during the early stages of the acute infection, and emphasized  
213 the need to consider each host organism as a unique environment. After 28 days, brains of chronically  
214 infected mice were isolated, and parasites expanded *in vitro*. Unexpectedly, most barcodes were identified in  
215 each individual host brain, with extinction events infrequently observed (**Fig. 2g, Table S1**). At the 28-day  
216 timepoint the cumulative extinction frequency across all 14 mice was 0.007 (10/1344), with extinction  
217 events associated with lower frequency barcodes within the starting infection population (**Table S3**). We  
218 also noted that extinction events were observed in NGS runs with lower total read counts, suggesting that  
219 extinctions could be due to reduced sequence sampling depth rather than a true absence of the specific  
220 barcoded parasite(s) in the brain (**Table S3**). This indicated that any selection bottleneck experienced by  
221 parasites during the colonization of the brain niche must be broad. Taken together these data suggest that  
222 with an inoculum of 37,000 parasites (roughly 370 parasites representing each barcode) limited founder  
223 effects act on the genetic diversity of the parasite population colonizing the brain.

224

### 225 ***The brain niche is permissive to colonization by T. gondii***

226 To better understand the process of colonization, we sought to quantify the effective population size in the  
227 brain and estimate the width of the acute-to-chronic infection bottleneck. Sequence tag-based analysis of  
228 microbial populations (STAMP) (Abel et al., 2015) frames molecular barcodes as neutral alleles, enabling  
229 classical population genetic theory and equations for effective population size estimates ( $N_e$ ) (Charlesworth,  
230 2009) to be applied to NGS datasets. The relative frequencies of all barcodes in a complex population are  
231 converted into a single metric of population diversity, which provides a direct estimation of founder  
232 population size, and approximates bottleneck width ( $N_e \approx N_b$ ). Due to fundamental differences in virulence of  
233 *Toxoplasma* strains (Behnke et al., 2011, Reikvam and Lorentzen-Styr, 1976), we anticipated that the  
234 absolute founder number would be strongly influenced by the genetic background of both the parasite and



235 the host (Watson and Davis, 2019). In light of this we sought to quantify relative changes in  $N_b$  as an  
236 indication of populations having been through a genetic selection bottleneck, analysing our dataset with the  
237 equations defined in the STAMP methodology (Abel et al., 2015). Our initial analyses indicated that  
238 compared to the infection inoculum, the population within the brain had experienced a restrictive bottleneck  
239 resulting in an  $\sim 100$ -fold reduction in  $N_b$  (**Fig. 2h**). Future experiments including further calibration of  $N_b$  are  
240 necessary before any conclusive statement regarding the absolute founder population number can be  
241 accurately made (Abel et al., 2015). Despite this, the consistency in the calculated  $N_b$  between the different  
242 individual host animals was remarkable. To further assess how  $N_b$  changed over the course of the infection  
243 we performed the same analysis of read data obtained from parasites populations within the peritoneal cavity  
244 after 48 hours, retrieved as the acute infection is being established. Surprisingly, the change in  $N_b$  at this  
245 early acute phase of the infection relative to the inoculum was similar that seen at 28 days (**Fig. 2h**). For one  
246 infection, the change in  $N_b$  was intermediate to that observed for the other mice in the group. Due to the  
247 terminal nature of parasite retrieval from the host, it was not possible to directly compare the relative  
248 frequency distribution of barcodes for a single inoculum replicate at the two points of infection in a single  
249 animal. However, on the basis of these data we hypothesize that the most restrictive bottleneck experienced  
250 by *T. gondii* during the course of an infection is within the early acute phase, with the BBB imposing  
251 negligible further restriction upon the parasite population diversity during colonization of the brain niche.  
252 This interpretation of the relative  $N_b$  values for the different stages of the infection is consistent with the  
253 detection of most barcoded parasite strains within the brains of chronically infected mice (**Fig. 2g**).  
254 Calculation of genetic distance (chord distance) is an additional way to quantify the genetic similarity of  
255 complex populations derived from one another, such as those obtained from different tissues and phases of  
256 infection (Abel et al., 2015, Cavalli-Sforza and Edwards, 1967). Bottlenecks lead to substantial genetic drift  
257 between populations, with greater chord distances indicative of a loss of population “relatedness”. Applying  
258 these equations, we found that there was no significant difference in chord distances between the populations  
259 at the different stages of infection relative to the starting population (**Fig. 2i**). These data indicate that there is  
260 no further genetic drift experienced by the parasite population following the initial acute phase as the brain is  
261 colonized. This further supports our data suggesting an absence of restrictive genetic selection bottlenecks  
262 during the establishment of the chronic phase of the *T. gondii* infection.

263

## 264 **Discussion**

265 A key role of the BBB is to restrict pathogen access to the immune-privileged brain niche (Kim, 2008).  
266 Unexpectedly our findings imply multiple, unique colonization events occur in the brain during chronic  
267 infection. Neuronal tissue is rich in fats, and in the case of prey species such as mice, represents a high-  
268 energy nutritional food component in the diets of predator species such as felids (Plantinga et al., 2011).  
269 Feline consumption of high-energy infected neuronal tissue of prey provides *T. gondii* with a route back into  
270 the definitive feline host (Dubey, 1997), and is an evolutionary strategy which increases the likelihood of  
271 feline transmission. A means to evade any restrictive bottleneck when colonizing the brain niche would be  
272 consistent with this evolutionary strategy, supporting maximal transmission of genetic diversity into the  
273 feline host to contribute to recombination in the subsequent sexual cycle. From the evolutionary perspective  
274 of the parasite this would be highly advantageous. The synergistic alignment of this macro scale ancient  
275 predator-prey relationship with the molecular features of the *T. gondii* host-pathogen interaction is truly  
276 remarkable.

277 The discoveries made in this study would have not been possible without a means to barcode this  
278 eukaryotic pathogen. Molecular barcoding has provided critical insights into the infection biology of viruses  
279 such as poliovirus (Kuss et al., 2008, Pfeiffer and Kirkegaard, 2006), and bacteria such as *Salmonella* (Grant  
280 et al., 2008, Lam and Monack, 2014, Lim et al., 2014, Kaiser et al., 2013), and we anticipate that barcoded  
281 *Toxoplasma* strains will have similar far reaching application. While barcode sequencing strategies have  
282 been leveraged for eukaryotic pathogen phenotypic screens (Alford et al., 2011, Bushell et al., 2017, Sidik  
283 et al., 2016), to our knowledge this is the first use of cellular barcodes to study the within-host infectious  
284 population structure of a eukaryotic pathogen. Our simple oligo barcoding strategy can be applied to any  
285 system accessible to CRISPR that contains endogenous or engineered negative selection markers. Our  
286 approach allows for parallel integration of even greater numbers of unique barcodes which, combined with  
287 STAMP (Abel et al., 2015), will provide increased precision in future host-pathogen population genetic  
288 studies and quantification of the absolute founder population number. With particular application to this  
289 complex host-pathogen interaction, researchers can now probe the within-host population genetics of the  
290 infection with an unprecedented degree of molecular resolution.

291

292

293 **Methods**

294 **Parasite cell culture:** *T. gondii* parasite strains were maintained by serial passage in confluent human  
295 foreskin fibroblasts (HFF-1 ATCC® SCRC-1041™). HFFs were cultured at 37 °C with 5% CO<sub>2</sub> in  
296 Dulbecco's Modified Eagle's medium supplemented with 10% foetal bovine serum and 2 mM L-glutamine.  
297 Tachyzoites were harvested via mechanical syringe lysis of heavily infected HFFs through a 25-gauge  
298 needle. RHΔ*ku80* parasites were used for *in vivo* and *in vitro* studies. PruΔ*ku80* parasites were used in *in*  
299 *vivo* experiments where chronic infections were established. Parasite strains were received as a kind gift  
300 from Dr Moritz Treeck.

301

302 **Generation of barcoded *T. gondii* strains and libraries:** 60-nucleotide single strand oligos were designed  
303 to include a unique 6 nucleotide barcode sequence flanked by a stop codon and homology regions on either  
304 side. The sequences of all oligos within the 96-member library can be found in **Table S2**. Barcoded libraries  
305 of tachyzoites were generated using two alternative strategies: For strategy A, 96 independent transfections  
306 were carried out in 16 well Nucleocuvette strips. 10 µg of the pSAG1::Cas9-U6::sgUPRT vector (Shen et al.,  
307 2014) and 10 µg of the barcode oligo (equivalent to an ~1:160 molar ratio of plasmid to oligo) were co-  
308 transfected into approximately 1×10<sup>6</sup> extracellular tachyzoites using the 4D-Nucleofector X Unit programme  
309 F1-115 (Lonza). 24 hours post-transfection, transgenic barcoded parasites were selected for using 5 µM 5'-  
310 fluoro-2'-deoxyuridine (FUDR). Barcoded strains were independently maintained, and only pooled just prior  
311 to use. For strategy B, a single “one-pot” transfection was carried out. An oligo library pool containing  
312 roughly equal amounts of all barcode oligos was prepared. The ratio of the pSAG1::Cas9-U6::sgUPRT  
313 vector to oligo pool was the same as in strategy A, though here the final concentration of any single oligo  
314 within the pool will be ~100-fold less. Transfection and selection was performed as for A, with the complex  
315 barcoded strain library generated and maintained as a single population.

316

317 **NGS library preparation:** Frozen cell pellets of extracellular tachyzoites were thawed to room temperature  
318 and genomic DNA extracted using the DNeasy Blood & Tissue Kit (Qiagen). Genomic DNA libraries were  
319 prepared following the 16S Metagenomic Sequencing Library Preparation guide (Illumina). In brief, an ~300  
320 base pair amplicon region containing the 6 nt barcode sequence was amplified from the barcoded UPRT  
321 locus using primer sequences (5' to 3')

322 **TCGTCGGCAGCGTCAGATGTGTATAAGAGACAG**tgatgtgcataccatggagtttctg and  
323 **GTCTCGTGGGCTCGGAGATGTGTATAAGAGACAG**gttttagtgaacaaagtgacagcagc. These primer  
324 sequences include the specified Illumina adapter overhang sequences (bold, uppercase). AMPure XP beads  
325 were used to purify the resulting PCR product. An indexing PCR was carried using the purified product as  
326 the template to ligate dual indices and sequencing adapters to the amplicon using the Nextera XT Index Kit  
327 (Illumina). Indexed libraries were then cleaned using AMPure XP beads and quantified on the Quantus  
328 Fluorometer using the QuantiFluor ONE dsDNA System (Promega). Amplicons were purity-checked and  
329 sized on a TapeStation using D1000 ScreenTape System (Agilent). For each NGS run, typically 8 to 25  
330 uniquely indexed libraries were pooled at equimolar concentrations for multiplexed outputs on either an  
331 Illumina MiSeq or NextSeq sequencer using the MiSeqV3 PE 75 bp kit or NextSeq 500/550 Mid Output  
332 v2.5 PE 75 bp kit respectively. PhiX DNA spike-in of 20% was used in all NGS. Following acquisition,  
333 sequencing data was demultiplexed and total sample reads extracted from fastq files using the Galaxy web  
334 platform. Sequencing reads were then concatenated, trimmed, and split into the respective barcodes. Phred  
335 QC scores for all NGS runs were >30 with the exception of a single run used for analysis of technical and  
336 biological replicates, which still gave an acceptable score of 28. Following trimming to the appropriate 6 nt  
337 region a stringent barcode mismatch tolerance of 0% was applied, typically resulting in 10-15% of total  
338 reads being discarded. Barcode read data was analysed using Prism 8 and correlations coefficients calculated  
339 within the software using Pearson analysis.

340  
341 **Mice:** 6-week old female C57BL/6 or CBA/J mice were purchased from Jackson Laboratories. Mice were  
342 acclimated for 7 days prior to infection. For studies using CBA/J mice, the animal protocols were approved  
343 by the University of Virginia Institutional Animal Care and Use Committee (protocol # 4107-12-18). All  
344 animals were housed and treated in accordance with AAALAC and IACUC guidelines at the University of  
345 Virginia Veterinary Service Center. The procedures involving C57BL/6 mice were approved by the local  
346 ethical committee of the Francis Crick Institute Ltd, Mill Hill Laboratory and are part of a project license  
347 approved by the Home Office, UK, under the Animals (Scientific Procedures) Act 1986.

348  
349 **Mouse infections:** The pooled barcode parasite library was expanded on HFFs in a T175 flask. Once full  
350 parasite vacuoles were observed, parasites were scraped and syringe lysed, counted on a haemocytometer

351 and diluted to an inoculum of 37,000 viable parasites in 200  $\mu$ L of PBC per mouse. The viability of parasites  
352 in the inoculum was confirmed by plaque assay. At the time of inoculation  $2 \times 10^6$  parasites were frozen as an  
353 initial population control. In addition, three inoculum control samples were expanded immediately on HFF  
354 T25 flasks. After 48 hours three mice were euthanized to isolate parasites in the peritoneal exudate.  
355 Specifically, 10 mL of PBS was injected by 25G needle into the peritoneal cavity, mice were rocked  
356 vigorously and peritoneal fluid removed by syringe. Parasites and exudate cells were washed twice in 10 mL  
357 of media containing penicillin/streptomycin, pelleted at 1,500 rpm and plated on HFFs T25 flasks. Parasites  
358 were harvested when they approached full lysis of the monolayer pelleted and frozen for genomic DNA  
359 isolation. After 28 days the remaining mice were euthanized. Carcasses were incubated in 20% bleach for 10  
360 minutes and the brain was excised in the biosafety cabinet under sterile conditions. To isolate parasites the  
361 brains were mashed through a 70  $\mu$ m filter using 25mL PBS with 5% FBS and penicillin/streptomycin. Brain  
362 mash was pelleted for 10 minutes at 1,500 rpm, washed twice then plated on HFF monolayers in T75 flasks.  
363 After 36 hours, media was changed to remove debris. Parasites were harvested by syringe lysis when the  
364 HFF monolayer was nearly lysed out (approximately 2 weeks), pelleted and frozen for genomic DNA  
365 isolation. To validate cyst formation in the brain at 28 days post infection 1/50th of the mash was reserved,  
366 fixed in 4% paraformaldehyde for 15 minutes then stained with a 1:500 dilution of dolichos biflorus  
367 agglutinin conjugated to FITC in PBS (Vector Labs). FITC-positive cysts were confirmed under 20x  
368 magnification.

369

370 **Bottleneck Analysis and Chord Distance Calculations:** Genetic selection bottlenecks experienced within  
371 the murine host were estimated by calculating changes in the relative frequencies of barcodes within  
372 dynamic *T. gondii* populations in relation to the starting population in the inoculum. Calculations of  
373 bottleneck width ( $N_b$ ) were performed according to method outlined by Abel *et al* (Abel et al., 2015) using  
374 the following equations:

375

376

377

378

379

$$\hat{F} = \frac{1}{k} \sum_{i=1}^k \frac{(f_{i,s} - f_{i,0})^2}{f_{i,0}(100 - f_{i,0})}$$

$$N_b \approx N_e = \frac{g}{\hat{F} - \frac{1}{S_0} - \frac{1}{S_s}}$$

$k$  = number of distinct alleles

$f_{i,0}$  = frequency of allele  $i$  at time 0

$f_{i,s}$  = frequency of allele  $i$  at sampling

$g$  = number of generations during competitive growth

$S_0$  = sample size at time 0

$S_s$  = sample size at sampling

380 The following equations (Cavalli-Sforza and Edwards, 1967) were used to calculate chord distance:

381

382

$$D_{ch} = \frac{2\sqrt{2}}{\pi} \sqrt{1 - \cos \theta}$$

383

384

$$\cos \theta = \sum_{i=1}^k \sqrt{f_{P1,i} f_{P2,i}}$$

385

386

$D_{ch}$  = chord distance

$k$  = number of distinct alleles

$f_{P1,i}$  = frequency of allele  $i$  in population 1

$f_{P2,i}$  = frequency of allele  $i$  in population 2

## 387 References

388 ABEL, S., ABEL ZUR WIESCH, P., CHANG, H. H., DAVIS, B. M., LIPSITCH, M. & WALDOR, M. K.

389 2015. Sequence tag-based analysis of microbial population dynamics. *Nat Methods*, 12, 223-6, 3 p

390

following 226.

391 AFGAN, E., BAKER, D., BATUT, B., VAN DEN BEEK, M., BOUVIER, D., CECH, M., CHILTON, J.,

392 CLEMENTS, D., CORAOR, N., GRUNING, B. A., GUERLER, A., HILLMAN-JACKSON, J.,

393 HILTEMANN, S., JALILI, V., RASCHE, H., SORANZO, N., GOECKS, J., TAYLOR, J.,

394 NEKRUTENKO, A. & BLANKENBERG, D. 2018. The Galaxy platform for accessible,

395 reproducible and collaborative biomedical analyses: 2018 update. *Nucleic Acids Res*, 46, W537-

396 W544.

397 ALSFORD, S., TURNER, D. J., OBADO, S. O., SANCHEZ-FLORES, A., GLOVER, L., BERRIMAN, M.,

398 HERTZ-FOWLER, C. & HORN, D. 2011. High-throughput phenotyping using parallel sequencing

399 of RNA interference targets in the African trypanosome. *Genome Res*, 21, 915-24.

400 BARRETT, M. P., KYLE, D. E., SIBLEY, L. D., RADKE, J. B. & TARLETON, R. L. 2019. Protozoan

401 persister-like cells and drug treatment failure. *Nat Rev Microbiol*, 17, 607-620.

402 BEHNKE, M. S., KHAN, A., WOOTTON, J. C., DUBEY, J. P., TANG, K. & SIBLEY, L. D. 2011.

403 Virulence differences in *Toxoplasma* mediated by amplification of a family of polymorphic

404 pseudokinases. *Proc Natl Acad Sci U S A*, 108, 9631-6.

405 BLUNDELL, J. R. & LEVY, S. F. 2014. Beyond genome sequencing: lineage tracking with barcodes to

406 study the dynamics of evolution, infection, and cancer. *Genomics*, 104, 417-30.

407 BUSHELL, E., GOMES, A. R., SANDERSON, T., ANAR, B., GIRLING, G., HERD, C., METCALF, T.,

408 MODRZYNSKA, K., SCHWACH, F., MARTIN, R. E., MATHER, M. W., MCFADDEN, G. I.,

- 409 PARTS, L., RUTLEDGE, G. G., VAIDYA, A. B., WENGELNIK, K., RAYNER, J. C. &  
410 BILLKER, O. 2017. Functional Profiling of a Plasmodium Genome Reveals an Abundance of  
411 Essential Genes. *Cell*, 170, 260-272 e8.
- 412 CAVALLI-SFORZA, L. L. & EDWARDS, A. W. 1967. Phylogenetic analysis. Models and estimation  
413 procedures. *Am J Hum Genet*, 19, 233-57.
- 414 CHARLESWORTH, B. 2009. Fundamental concepts in genetics: effective population size and patterns of  
415 molecular evolution and variation. *Nat Rev Genet*, 10, 195-205.
- 416 DONALD, R. G. & ROOS, D. S. 1995. Insertional mutagenesis and marker rescue in a protozoan parasite:  
417 cloning of the uracil phosphoribosyltransferase locus from *Toxoplasma gondii*. *Proc Natl Acad Sci*  
418 *U S A*, 92, 5749-53.
- 419 DUBEY, J. P. 1997. Tissue cyst tropism in *Toxoplasma gondii*: a comparison of tissue cyst formation in  
420 organs of cats, and rodents fed oocysts. *Parasitology*, 115 ( Pt 1), 15-20.
- 421 ELSHEIKHA, H. M. & KHAN, N. A. 2010. Protozoa traversal of the blood-brain barrier to invade the  
422 central nervous system. *FEMS Microbiol Rev*, 34, 532-53.
- 423 GRANT, A. J., RESTIF, O., MCKINLEY, T. J., SHEPPARD, M., MASKELL, D. J. & MASTROENI, P.  
424 2008. Modelling within-host spatiotemporal dynamics of invasive bacterial disease. *PLoS Biol*, 6,  
425 e74.
- 426 HUYNH, M. H. & CARRUTHERS, V. B. 2009. Tagging of endogenous genes in a *Toxoplasma gondii*  
427 strain lacking Ku80. *Eukaryot Cell*, 8, 530-9.
- 428 KAISER, P., SLACK, E., GRANT, A. J., HARDT, W. D. & REGOES, R. R. 2013. Lymph node  
429 colonization dynamics after oral *Salmonella Typhimurium* infection in mice. *PLoS Pathog*, 9,  
430 e1003532.
- 431 KEBSCHULL, J. M. & ZADOR, A. M. 2018. Cellular barcoding: lineage tracing, screening and beyond.  
432 *Nat Methods*, 15, 871-879.
- 433 KIM, K. S. 2008. Mechanisms of microbial traversal of the blood-brain barrier. *Nat Rev Microbiol*, 6, 625-  
434 34.
- 435 KUSS, S. K., ETHEREDGE, C. A. & PFEIFFER, J. K. 2008. Multiple host barriers restrict poliovirus  
436 trafficking in mice. *PLoS Pathog*, 4, e1000082.

- 437 LAM, L. H. & MONACK, D. M. 2014. Intraspecies competition for niches in the distal gut dictate  
438 transmission during persistent Salmonella infection. *PLoS Pathog*, 10, e1004527.
- 439 LIM, C. H., VOEDISCH, S., WAHL, B., ROUF, S. F., GEFFERS, R., RHEN, M. & PABST, O. 2014.  
440 Independent bottlenecks characterize colonization of systemic compartments and gut lymphoid  
441 tissue by salmonella. *PLoS Pathog*, 10, e1004270.
- 442 LUFT, B. J., HAFNER, R., KORZUN, A. H., LEPORT, C., ANTONISKIS, D., BOSLER, E. M.,  
443 BOURLAND, D. D., 3RD, UTTAMCHANDANI, R., FUHRER, J., JACOBSON, J. & ET AL.  
444 1993. Toxoplasmic encephalitis in patients with the acquired immunodeficiency syndrome.  
445 Members of the ACTG 077p/ANRS 009 Study Team. *N Engl J Med*, 329, 995-1000.
- 446 PFEIFFER, J. K. & KIRKEGAARD, K. 2006. Bottleneck-mediated quasispecies restriction during spread of  
447 an RNA virus from inoculation site to brain. *Proc Natl Acad Sci U S A*, 103, 5520-5.
- 448 PLANTINGA, E. A., BOSCH, G. & HENDRIKS, W. H. 2011. Estimation of the dietary nutrient profile of  
449 free-roaming feral cats: possible implications for nutrition of domestic cats. *Br J Nutr*, 106 Suppl 1,  
450 S35-48.
- 451 PROFACI, C. P., MUNJI, R. N., PULIDO, R. S. & DANEMAN, R. 2020. The blood-brain barrier in health  
452 and disease: Important unanswered questions. *J Exp Med*, 217.
- 453 REIKVAM, A. & LORENTZEN-STYR, A. M. 1976. Virulence of different strains of *Toxoplasma gondii*  
454 and host response in mice. *Nature*, 261, 508-9.
- 455 RIBET, D. & COSSART, P. 2015. How bacterial pathogens colonize their hosts and invade deeper tissues.  
456 *Microbes Infect*, 17, 173-83.
- 457 SHEN, B., BROWN, K. M., LEE, T. D. & SIBLEY, L. D. 2014. Efficient gene disruption in diverse strains  
458 of *Toxoplasma gondii* using CRISPR/CAS9. *mBio*, 5, e01114-14.
- 459 SIDIK, S. M., HUET, D., GANESAN, S. M., HUYNH, M. H., WANG, T., NASAMU, A. S., THIRU, P.,  
460 SAEIJ, J. P., CARRUTHERS, V. B., NILES, J. C. & LOURIDO, S. 2016. A Genome-wide CRISPR  
461 Screen in *Toxoplasma* Identifies Essential Apicomplexan Genes. *Cell*, 166, 1423-1435 e12.
- 462 SMITH, A. M., HEISLER, L. E., MELLOR, J., KAPER, F., THOMPSON, M. J., CHEE, M., ROTH, F. P.,  
463 GIAEVER, G. & NISLOW, C. 2009. Quantitative phenotyping via deep barcode sequencing.  
464 *Genome Res*, 19, 1836-42.



465 WALDMAN, B. S., SCHWARZ, D., WADSWORTH, M. H., 2ND, SAEIJ, J. P., SHALEK, A. K. &  
466 LOURIDO, S. 2020. Identification of a Master Regulator of Differentiation in *Toxoplasma*. *Cell*,  
467 180, 359-372 e16.

468 WATSON, G. F. & DAVIS, P. H. 2019. Systematic review and meta-analysis of variation in *Toxoplasma*  
469 *gondii* cyst burden in the murine model. *Exp Parasitol*, 196, 55-62.

470 WOHLFERT, E. A., BLADER, I. J. & WILSON, E. H. 2017. Brains and Brawn: *Toxoplasma* Infections of  
471 the Central Nervous System and Skeletal Muscle. *Trends Parasitol*, 33, 519-531.

472

473 **Acknowledgements:**

474 This work was supported by grants NC/S001239/1 from the NC3Rs (to C.J.W and M.A.C), and  
475 202553/Z/16/Z from the Wellcome Trust & Royal Society (to M.A.C.). This work was also supported by  
476 the Francis Crick Institute (FC001076 to EMF), which receives its core funding from Cancer  
477 Research UK, the UK Medical Research Council, and the Wellcome Trust. EMF was supported by  
478 a Senior Wellcome Trust Fellowship (217202/Z/19/Z). The Imperial BRC Genomics Facility provided  
479 resources and support that contributed to the research results reported within this paper. The Imperial BRC  
480 Genomics Facility is supported by NIHR funding to the Imperial Biomedical Research Centre. Ivan Andrew,  
481 JP Haywood and Laurence Game at the UKRI London Institute of Medical Sciences Genomics Laboratory.  
482 We would also like to thank Dr Ellen M. McDonagh for critical reading of the manuscript.

483

484 **Author Contributions:** Conception/design of the work: EF, SEE, MAC. Acquisition/analysis/interpretation  
485 of data: CJW, GS, MB, EDSA, HJB, SEE, MAC. Manuscript drafting and revision: CJW, GS, EDSA, HJB,  
486 EF, SEE, MAC

487

488 **Competing interests:** The authors declare no competing interests.

489

490 **Materials & Correspondence:** All correspondence and material requests should be addressed to MAC,  
491 [m.child@imperial.ac.uk](mailto:m.child@imperial.ac.uk)

492

493 **Figure 1**

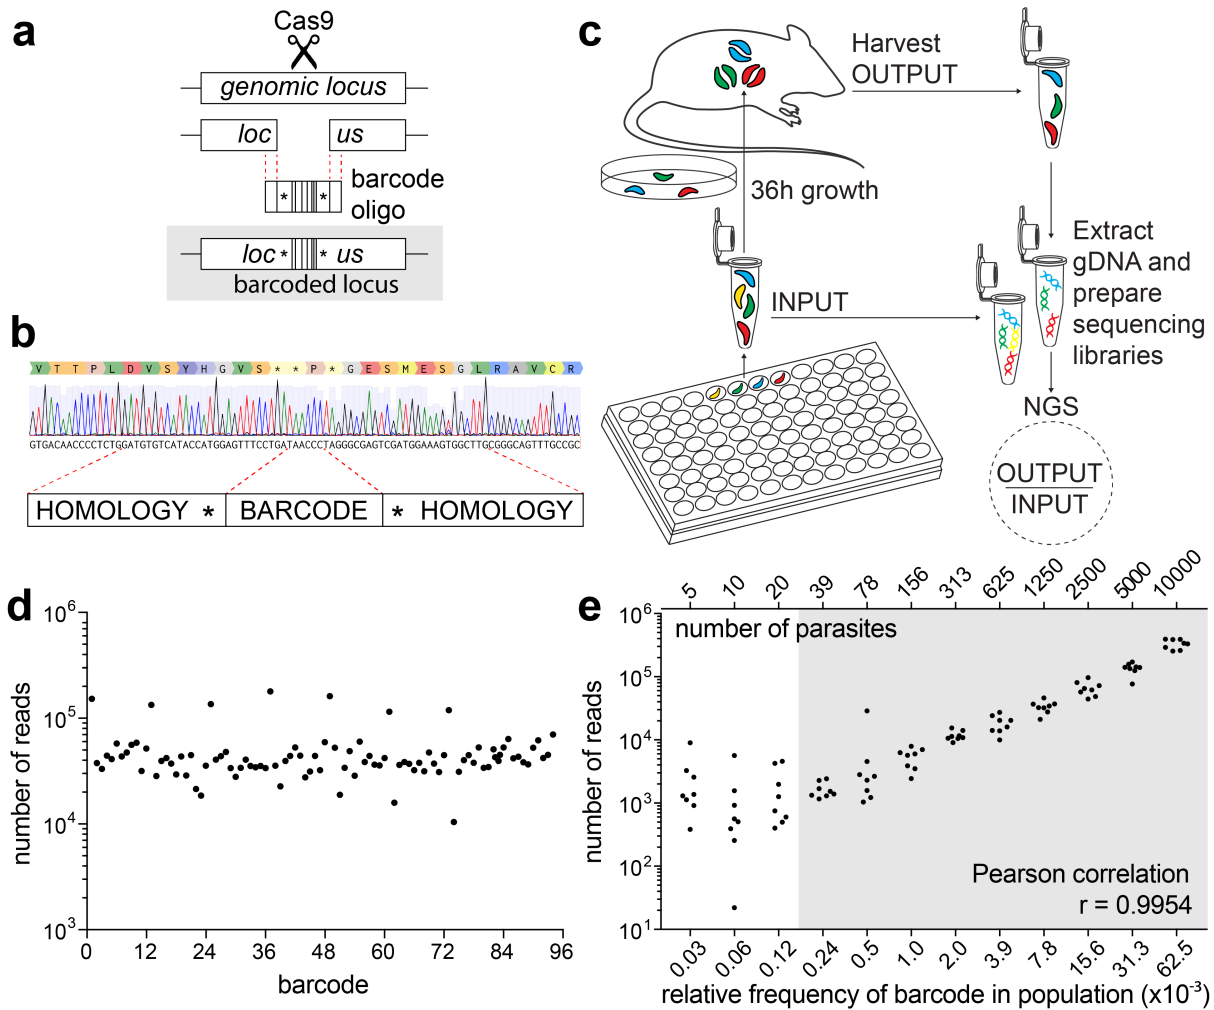

494

495 **Figure 1: *T. gondii* tachyzoites can be molecularly barcoded using a simple CRISPR-based strategy. a)**

496 Schematic of molecular barcoding strategy. A CRISPR guide RNA targets Cas9 to the *UPRT* locus, where

497 Cas9 endonuclease activity introduces a double strand break. This break is repaired by HDR, with the co-

498 transfected 60mer barcode oligo used as the donor template. **b)** Sanger sequencing confirmation that barcode

499 integration results in the simultaneous disruption of the *UPRT* coding sequence, destruction of the

500 protospacer DNA sequence and PAM. **c)** Multiplexed transfection strategy and NGS pipeline to generate

501 barcoded libraries of *T. gondii* tachyzoites for *in vitro* and *in vivo* studies. **d)** Complex libraries containing 96

502 uniquely barcoded strains can be produced, with individual barcodes identified and quantified within NGS

503 datasets. Scatter plot presents read counts for individual barcodes. **e)** Individual barcodes can be detected at

504 low frequencies, and read depth is a sensitive proxy for parasite number. Scatter plot presents number of

505 reads for a serial two-fold dilution series of known numbers of parasites and the relative frequency of

506 individual barcodes in the population. The shaded area indicates the data used to calculate the PCC provided:

507  $r = 0.9954$ ,  $n = 9$ ,  $P$  (two-tailed) =  $<0.0001$ .

508

509

510

511

512

513

514

515

516

517

518

519

520

521

522

523

524

525

526

527

528

529

530

531

532

533

534

535 **Figure 2**

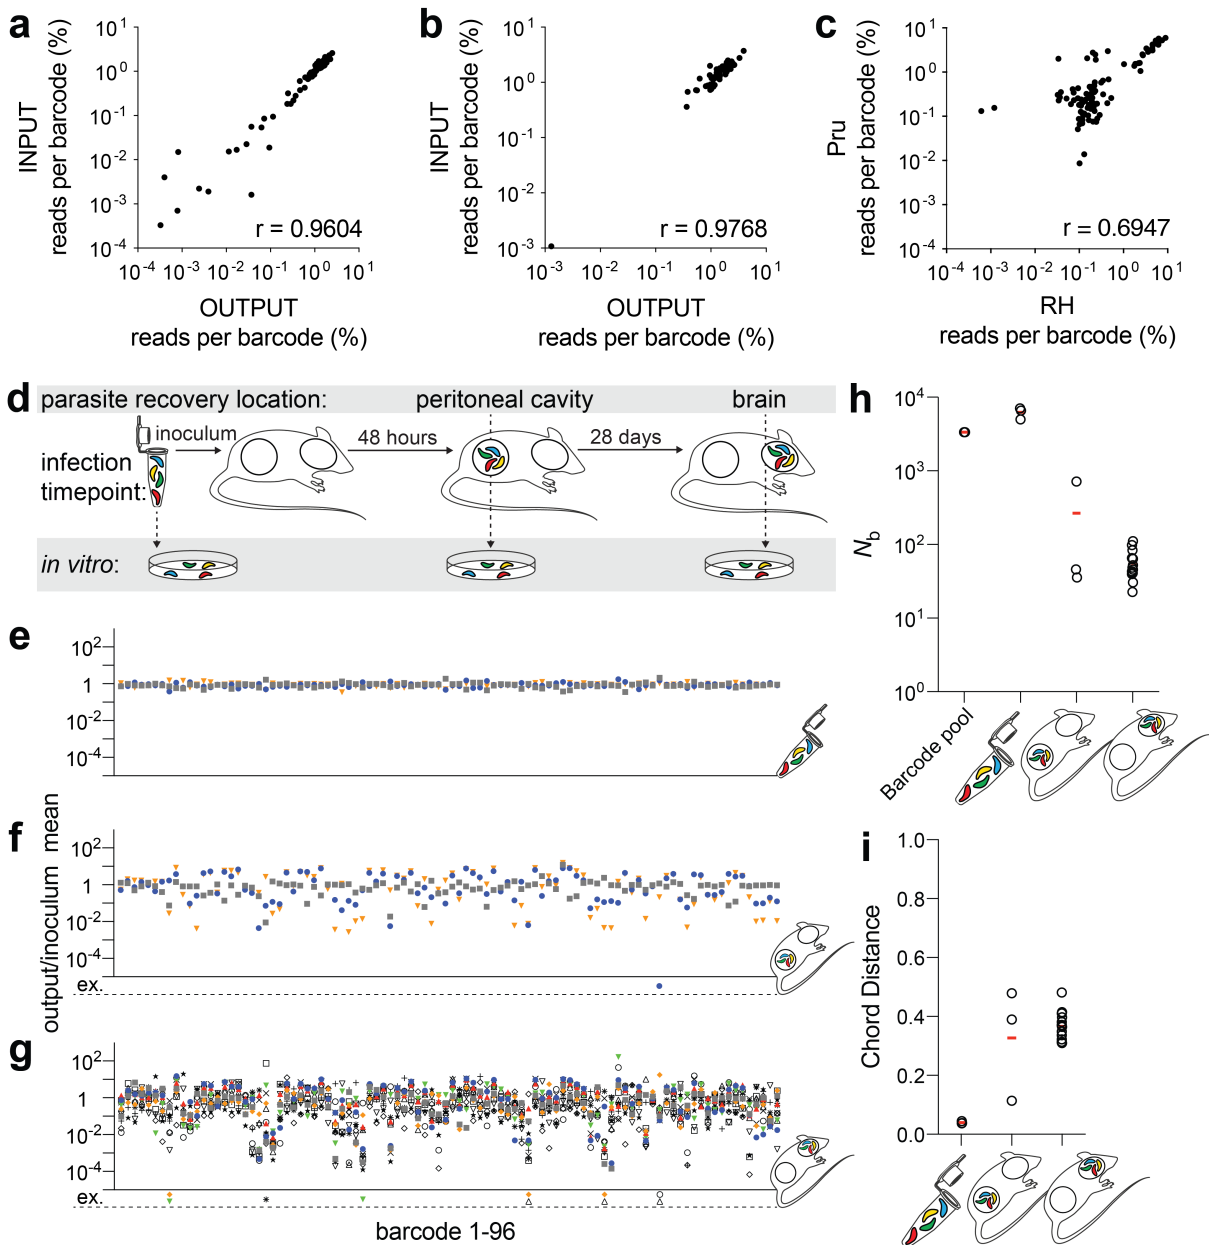

536

537

538 **Figure 2: Barcoded libraries of *T. gondii* parasites are stably maintained *in vitro* and *in vivo*, and can**  
 539 **be generated via one-pot transfections. a)** The population structure of complex barcode libraries is stable  
 540 *in vitro*. Scatter plot comparing individual barcode frequencies within the complex pooled library population  
 541 for an INPUT sample (used for the *in vitro* infection) and the OUTPUT sample harvested following a single  
 542 lytic growth cycle (~36 hours). PCC  $r = 0.96$ ,  $n = 96$ ,  $P$  (two-tailed) =  $<0.0001$ . **b)** The population structure  
 543 of complex barcode libraries is stable during early stages of an *in vivo* infection. Scatter plot comparing  
 544 individual barcode frequencies within a pooled library population for an INPUT sample (the peritoneal  
 545 infection inoculum) and the OUTPUT sample harvested from the peritoneal cavity following 36 hours of

546 growth. PCC  $r = 0.98$ ,  $n = 63$ ,  $P$  (two-tailed) =  $<0.0001$ . **c)** Scatter plot of relative barcode frequencies  
547 comparing barcoded libraries of parasites generated for two different *T. gondii* strains (RH $\Delta ku80$  and  
548 Pru $\Delta ku80$ ) where the one-pot transfection was performed using the same pool of barcoding oligos. PCC  $r =$   
549  $0.69$ ,  $n = 96$ ,  $P$  (two-tailed) =  $<0.0001$ . PCC values provided on scatter plots indicate degree of correlation  
550 between different populations being compared. **d)** Schematic of an experiment investigating changes in the  
551 population structure of *T. gondii* over the course of a 28-day *in vivo* infection. The infection is artificially  
552 initiated within the peritoneal cavity (, and the infectious population structure monitored at an early acute (48  
553 hours) and chronic phase (28 days). The timepoints are compared to the inoculum mean to identify host  
554 bottlenecks restricting diversity. **e-g)** Scatter plot of changes in individual barcode frequencies relative to the  
555 inoculum mean in the inoculum (**e**), the peritoneal cavity at 48 hours,  $n = 3$  (**f**), and the brain at 28 days,  $n =$   
556  $14$  (**g**). Barcode extinctions (ex.) are indicated below the x-axis in the corresponding position to the absent  
557 barcoded strain (see also table S1). **h)** Scatter plot of calculated  $N_b$  values for parasite populations presents  
558 relative changes in total population barcode frequencies during the establishment of the acute and chronic  
559 infection in the peritoneal cavity and brain respectively. **i)** Scatter plot of calculated chord distances presents  
560 the relatedness and genetic distance between two distinct population samples (acute and chronic) relative to  
561 the starting population in the inoculum.

562

563

564

565

566

567

568

569

570

571

572

573

574

575 **Supplemental Material**

576

577 **Table S1**

| Infection timepoint: | 48 hours           |                      |                     | 28 days             |                    |                      |                     |                      |                     |                     |                     |                     |                      |                     |                     |                     |                      |
|----------------------|--------------------|----------------------|---------------------|---------------------|--------------------|----------------------|---------------------|----------------------|---------------------|---------------------|---------------------|---------------------|----------------------|---------------------|---------------------|---------------------|----------------------|
| Mouse #              | 1                  | 2                    | 3                   | 1                   | 2                  | 3                    | 4                   | 5                    | 6                   | 7                   | 8                   | 9                   | 10                   | 11                  | 12                  | 13                  | 14                   |
| Barcode #            | -                  | 79                   | -                   | -                   | -                  | 8, 60, 71            | -                   | 8, 36                | -                   | -                   | 79                  | -                   | 60, 71, 79           | -                   | -                   | -                   | 22                   |
| Total read #         | 14x10 <sup>6</sup> | 0.59x10 <sup>6</sup> | 2.3x10 <sup>6</sup> | 8.3x10 <sup>6</sup> | 10x10 <sup>6</sup> | 0.62x10 <sup>6</sup> | 6.3x10 <sup>6</sup> | 0.46x10 <sup>6</sup> | 8.0x10 <sup>6</sup> | 3.3x10 <sup>6</sup> | 1.8x10 <sup>6</sup> | 4.1x10 <sup>6</sup> | 0.73x10 <sup>6</sup> | 5.0x10 <sup>6</sup> | 1.7x10 <sup>6</sup> | 4.2x10 <sup>6</sup> | 0.92x10 <sup>6</sup> |

578

579 **Table S1:** Details of barcode extinctions occurring during the different phases of infection. Barcode numbers  
580 and the mouse in which the extinction was observed are noted. Extinctions are defined by an absence of the  
581 barcode sequence within the processed NGS read data.

582

583

584 **Figure S1**

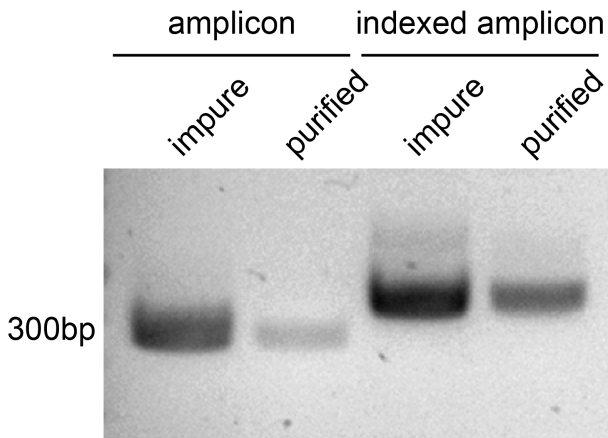

585

586

587 **Figure S1: Construction of NGS libraries for amplicon deep sequencing.** A single ~300 bp amplicon was  
588 amplified from genomic DNA, and purified (amplicon, lanes 1 and 2). The purified amplicon was then  
589 indexed and re-purified prior to quantification and sizing (indexed amplicon, lanes 3 and 4).

590

591

592

593

594

595 **Figure S2**

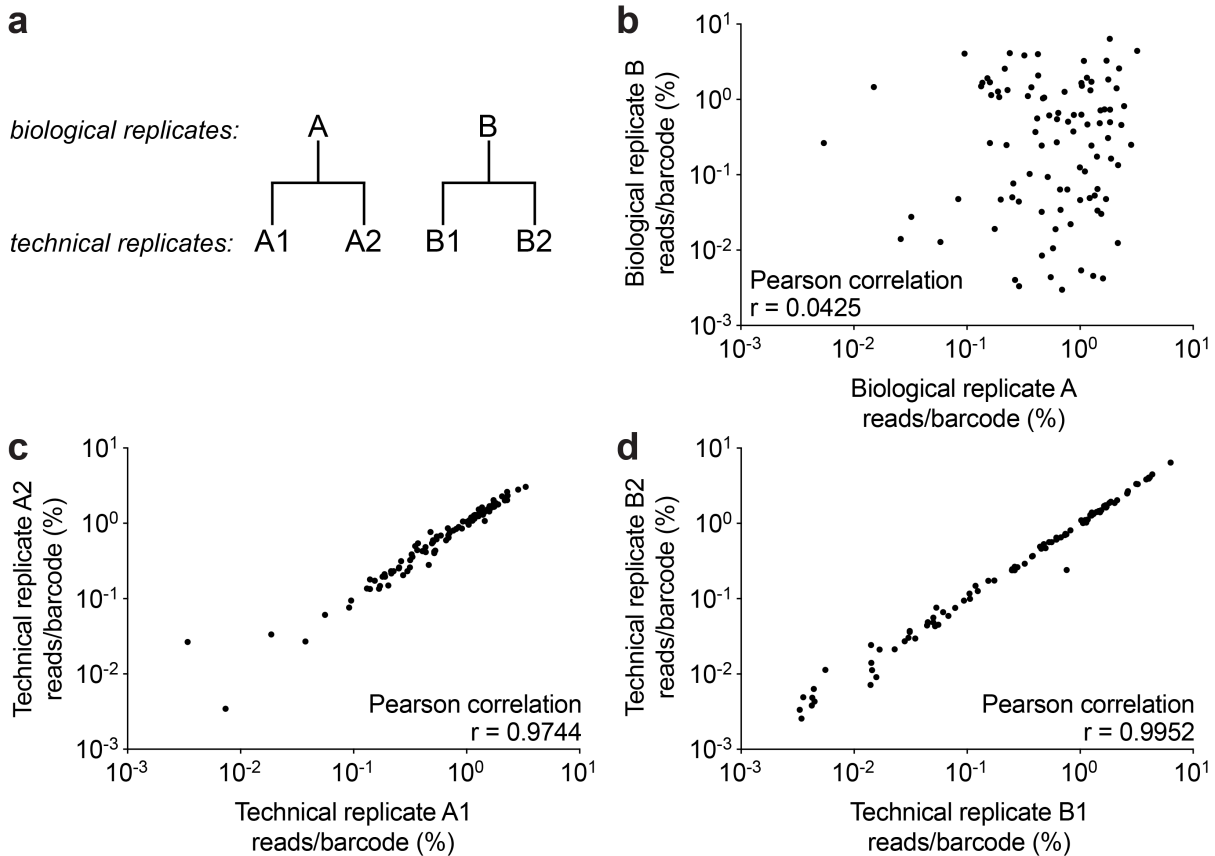

596

597

598 **Figure S2: Analysis of experimental variation for barcoded parasite libraries and NGS pipeline. a)**

599 Strategy to identify the primary major source of variation within the multiplexed transfection barcoding

600 strategy and NGS pipeline. Scatter plots present data comparing the percentage representation of individual

601 barcodes within library pools for (b) biological replicates, PCC  $r = 0.0425$ ,  $n = 96$ ,  $P$  (two-tailed) = 0.6807

602 (n.s.), and technical replicates (c) PCC  $r = 0.9744$ ,  $n = 96$ ,  $P$  (two-tailed) =  $<0.0001$ , and (d) PCC  $r =$

603  $0.9952$ ,  $n = 96$ ,  $P$  (two-tailed) =  $<0.0001$ . PCC values provided on scatter plots indicate degree of correlation

604 between different populations being compared.

605

606

607

608

609

610

611

612 **Figure S3**

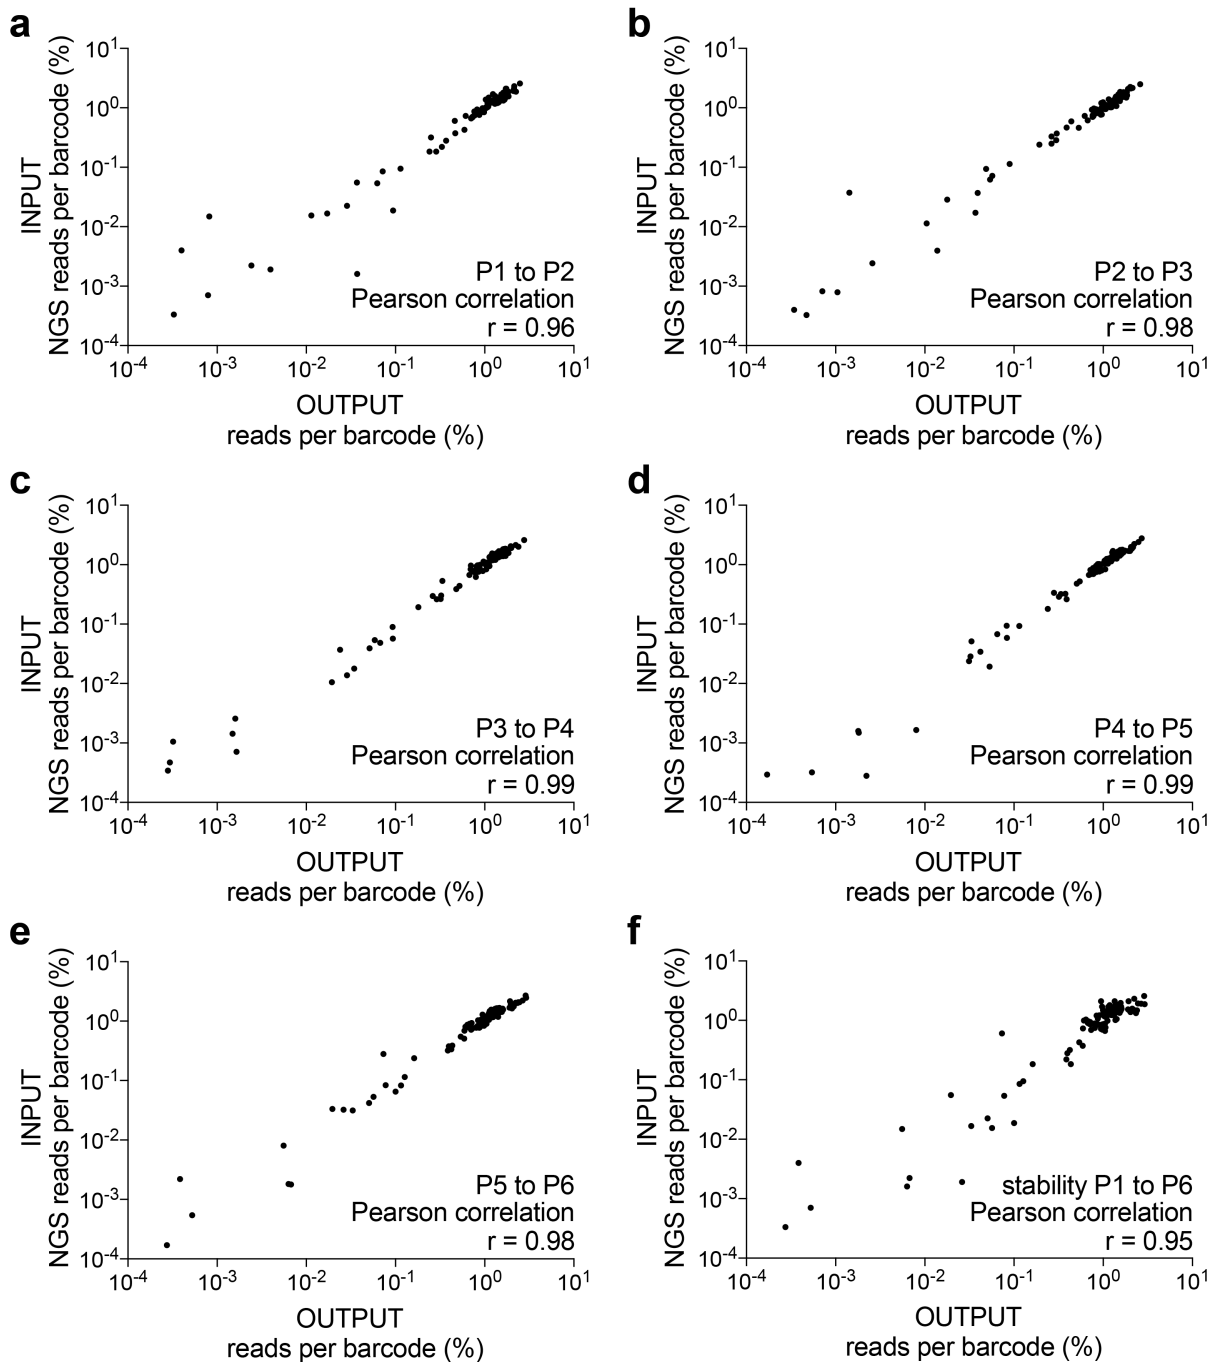

613

614

615 **Figure S3: Assessment of barcoded strain library *in vitro* stability.** A barcoded library of parasites was  
616 serially passaged through HFF host cells, and sampled following the completion of each lytic cycle (~36  
617 hours/passage). Scatter plots present data comparing the percentage representation of individual barcodes  
618 within library pools for the passages indicated on the plots. (a) is a repeat of data presented in figure 2a, and  
619 shown here for completeness and comparison alongside the entire serial passage experiment dataset. PCC  
620 values provided on scatter plots indicate degree of correlation between different populations being



621 compared: PCC **a**)  $r = 0.96$ ,  $n = 96$ ,  $P$  (two-tailed) =  $<0.0001$ . **b**)  $r = 0.98$ ,  $n = 96$ ,  $P$  (two-tailed) =  $<0.0001$ .  
622 **c**)  $r = 0.99$ ,  $n = 96$ ,  $P$  (two-tailed) =  $<0.0001$ . **d**)  $r = 0.99$ ,  $n = 96$ ,  $P$  (two-tailed) =  $<0.0001$ . **e**)  $r = 0.98$ ,  $n =$   
623  $96$ ,  $P$  (two-tailed) =  $<0.0001$ . **f**)  $r = 0.95$ ,  $n = 96$ ,  $P$  (two-tailed) =  $<0.0001$ .

624

625

626

627

628

629

630

631

632

633

634

635

636

637

638

639

640

641

642

643

644

645

646

647

648

649

650 **Figure S4**

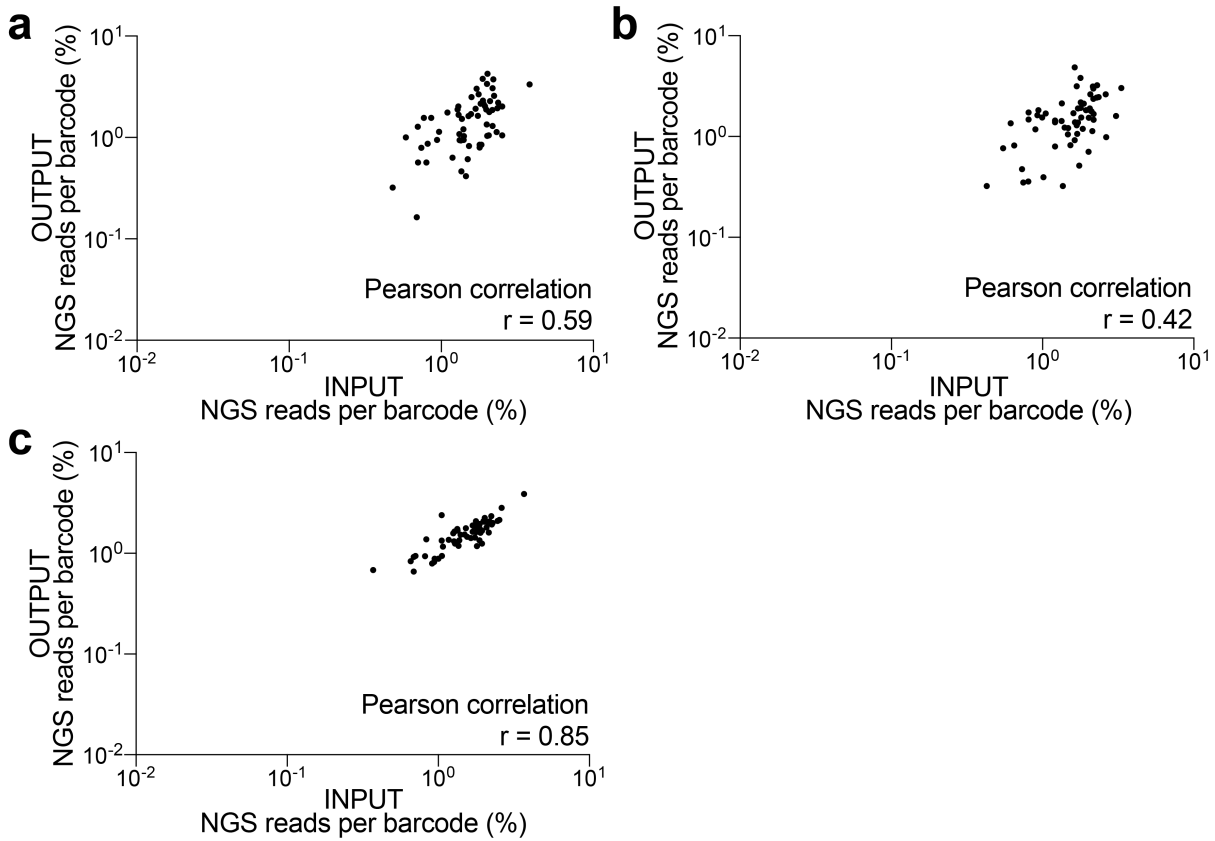

651

652

653 **Figure S4: Assessment of *in vivo* stability of barcoded libraries of parasites.** Three separate inoculums of  
654 the same complex barcode library pool were injected intraperitoneally into mice, allowed to grow for 36  
655 hours, and then retrieved. Scatter plots present data for the percentage representation of individual barcodes  
656 within the library pools for parasite infection inoculums (INPUT) compared with the corresponding  
657 population retrieved from the peritoneal cavity of the infected host (OUTPUT) for (a)  $0.25 \times 10^6$  parasites,  
658 PCC  $r = 0.59$ ,  $n = 62$ ,  $P$  (two-tailed) =  $<0.0001$ . (b)  $0.5 \times 10^6$  parasites, PCC  $r = 0.62$ ,  $n = 62$ ,  $P$  (two-tailed) =  
659  $0.0006$ . (c)  $1 \times 10^6$  parasites, PCC  $r = 0.85$ ,  $n = 62$ ,  $P$  (two-tailed) =  $<0.0001$ . PCC values provided on scatter  
660 plots indicate degree of correlation between populations being compared.

661

662

663

664

665

666

667 **Figure S5**

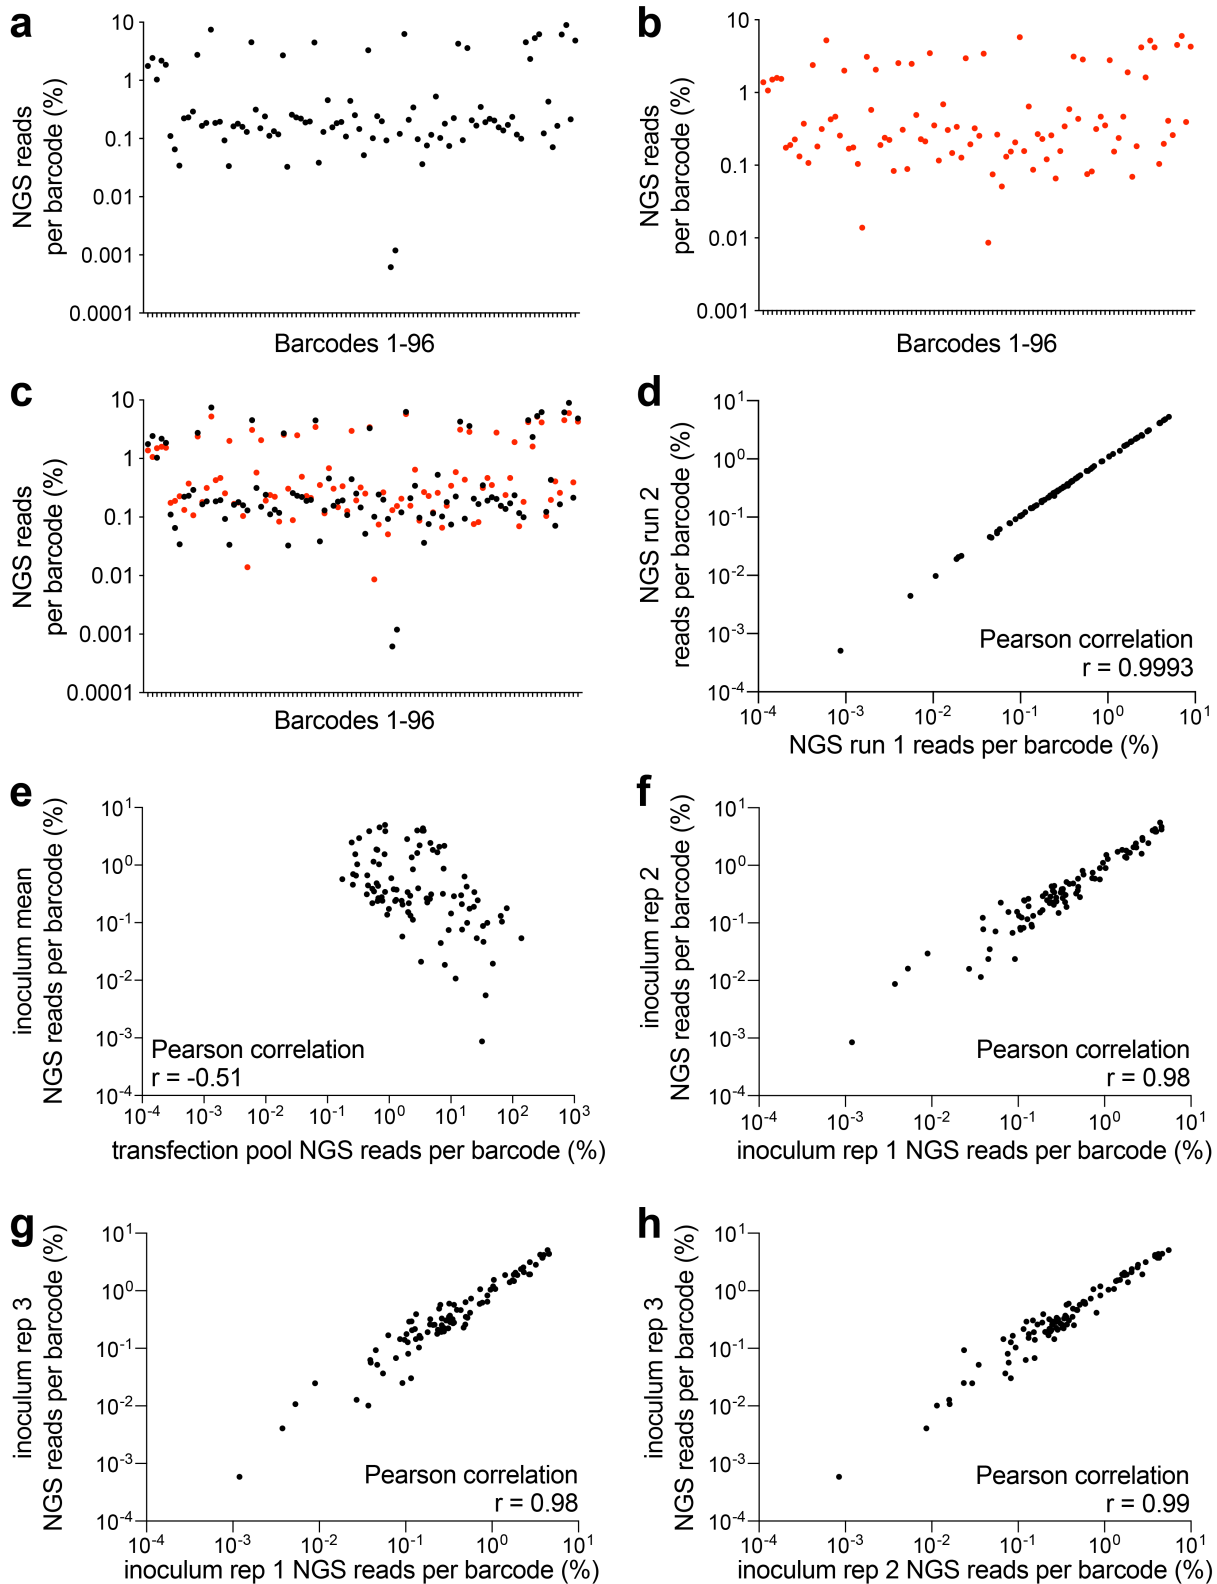

668

669

670 **Figure S5: Analysis of molecularly barcoded *T. gondii* libraries generated using a one-pot transfection**

671 **approach.** One-pot transfections using (a) RH $\Delta ku80$  or (b) Pru $\Delta ku80$  yield a complex library of barcoded

672 strains with complete representation of all 96 oligos included in the transfection pool. c) Overlay of data

673 from the different strain transfections (**b** and **c**). Scatter plots in **a-c** present relative percentage frequency of  
674 barcodes within the population, distributed according to barcode identifier (1-96). **d**) Scatter plot of relative  
675 percentage frequency of barcodes within a single genomic sample, processed on independent NGS runs.  
676 PCC  $r = 0.99$ ,  $n = 96$ ,  $P$  (two-tailed) =  $<0.0001$ . **e-h**) Scatter plots comparing relative percentage frequency  
677 of barcode for the one-pot transfection pool versus the expanded inoculum mean (**e**) PCC  $r = -0.50$ ,  $n = 96$ ,  $P$   
678 (two-tailed) =  $<0.0001$ , and comparison of each of the three independently *in vitro*-expanded biological  
679 replicates of the inoculum used for the mouse infection (**f**) PCC  $r = 0.98$ ,  $n = 96$ ,  $P$  (two-tailed) =  $<0.0001$ ;  
680 (**g**) PCC  $r = 0.98$ ,  $n = 96$ ,  $P$  (two-tailed) =  $<0.0001$ ; (**h**) PCC  $r = 0.99$ ,  $n = 96$ ,  $P$  (two-tailed) =  $<0.0001$ . PCC  
681 values provided on scatter plots indicate degree of correlation between populations being compared.  
682
